# Supplementary material
Source: HighWire-hosted journal article supplement (https://cmaj.ca/highwire/filestream/75870/field_highwire_adjunct_files/0/200626-five-1-at.pdf)
Supplement: 200626-five-1-at.pdf [file 200626-five-1-at.pdf]

**Appendix 1 (as supplied by authors)**

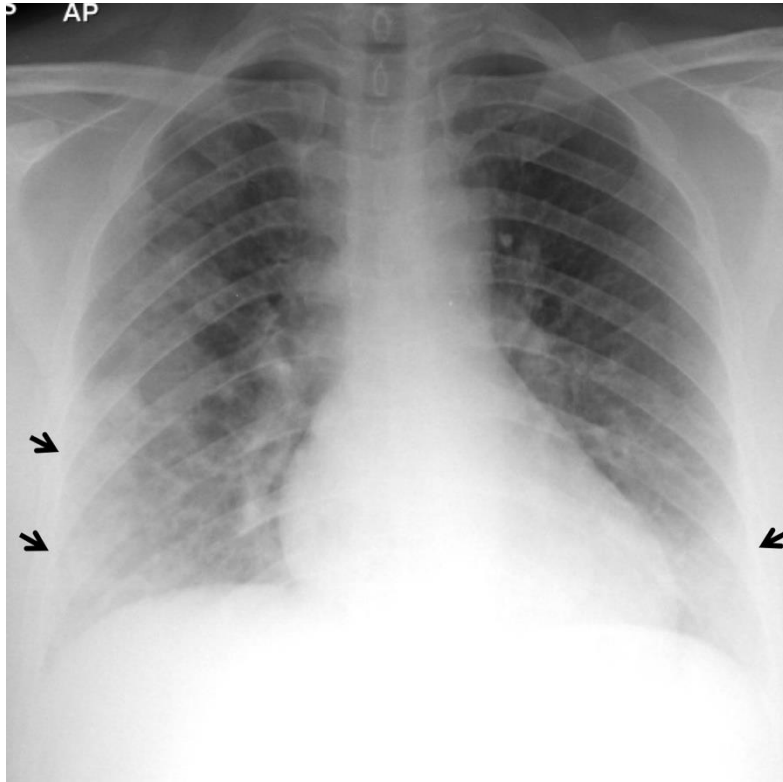

Chest radiograph of a 49-year-old woman with coronavirus disease 2019 (COVID-19) showing bilateral patchy airspace opacities (arrows) in a predominantly basal and peripheral distribution.
